# Supplementary material
Source: Springer Nature journal article supplement (https://www.springermedizin.de/resource/supplementary/12958_2010_653_MOESM2_ESM.pdf/9568510)

**A**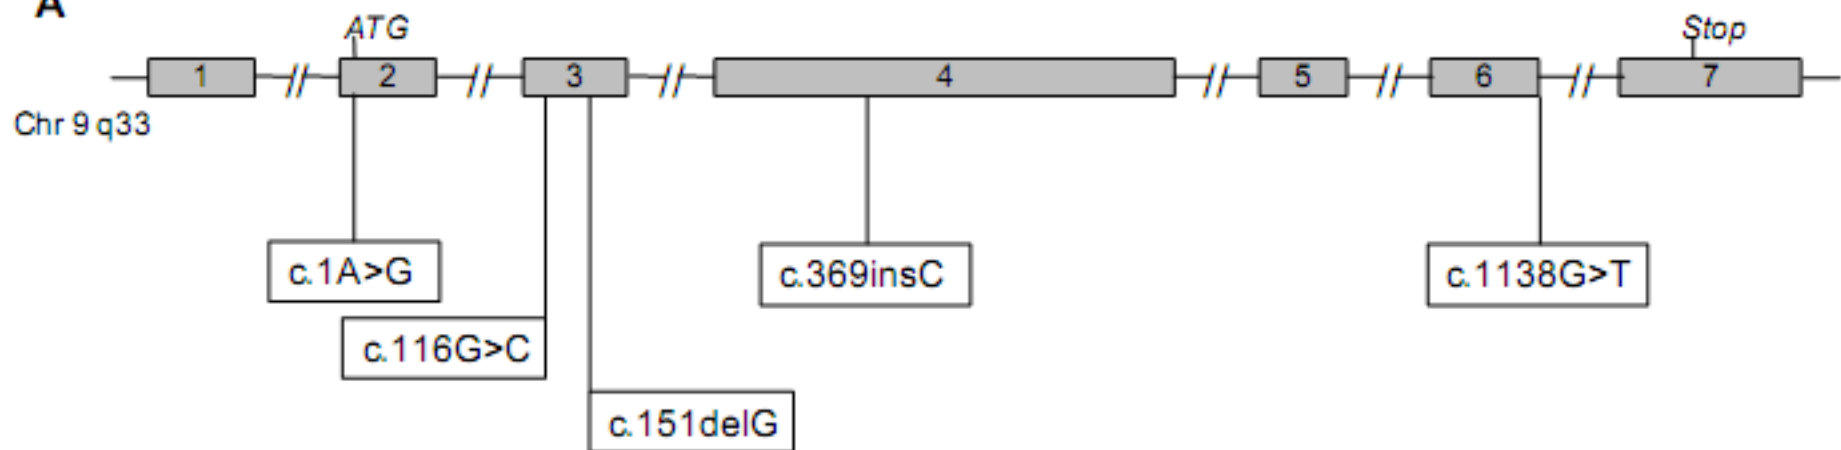**B**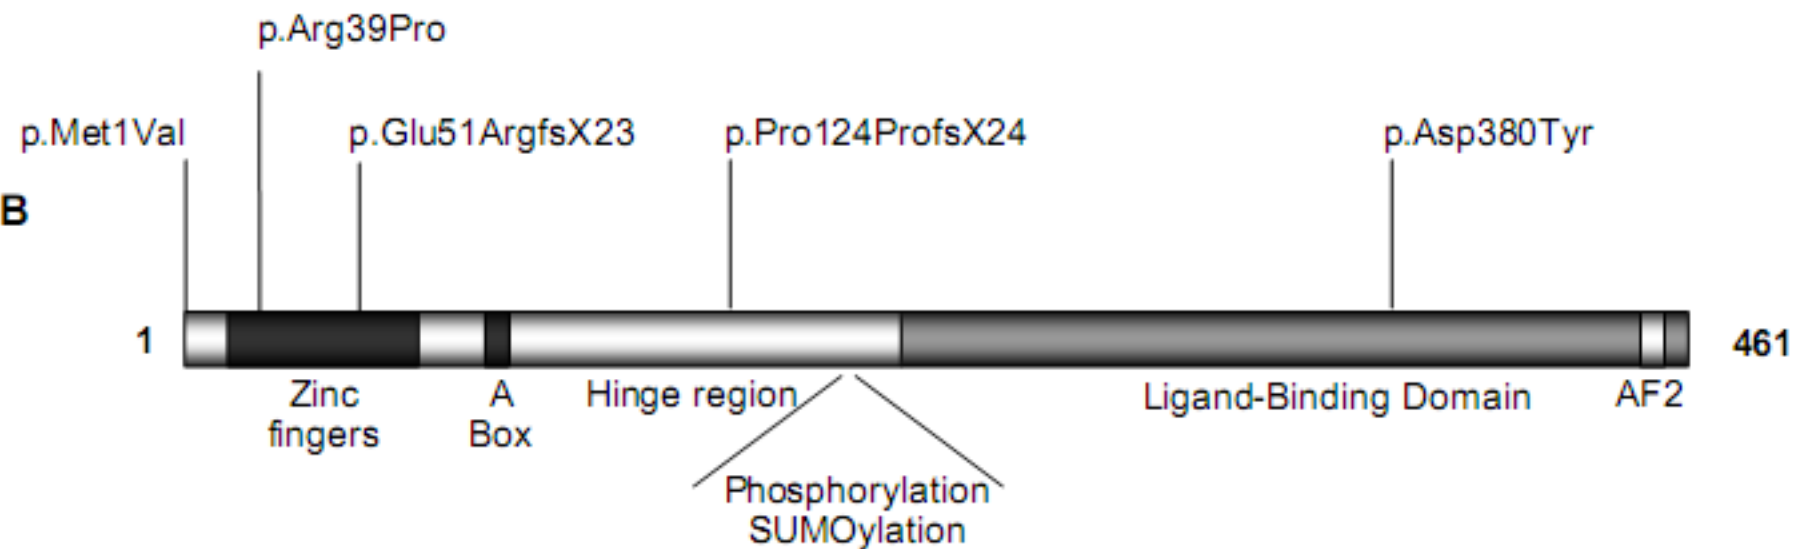

Supplement: MOESM2 [file 9568510]
